# Supplementary material
Source: PubMed Central journal article supplement (PMC3260496)

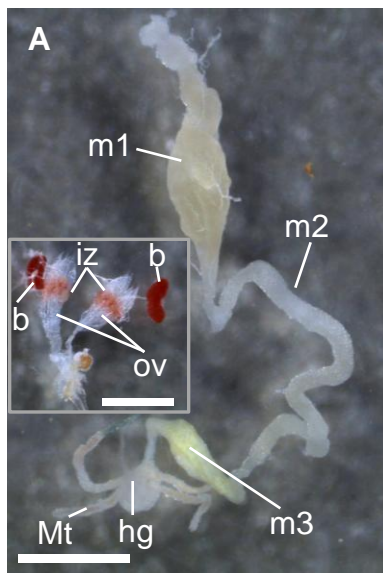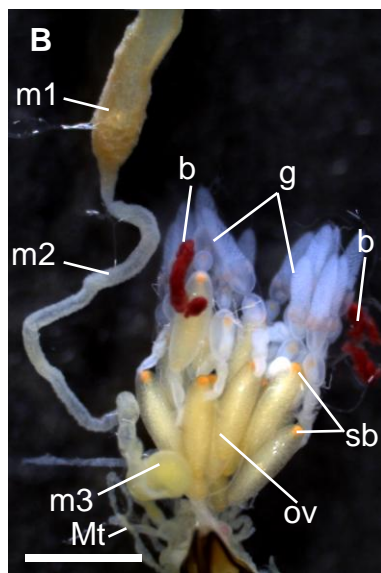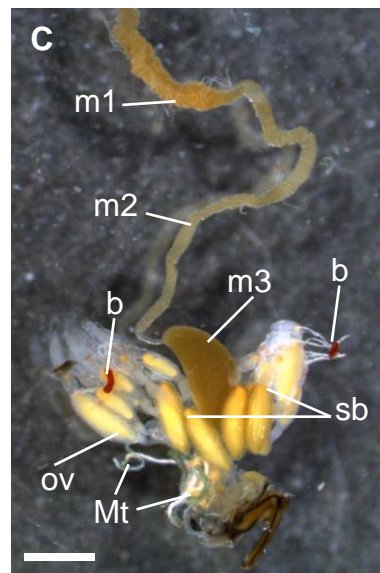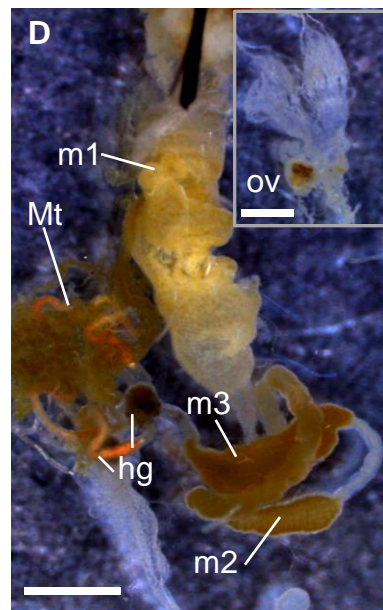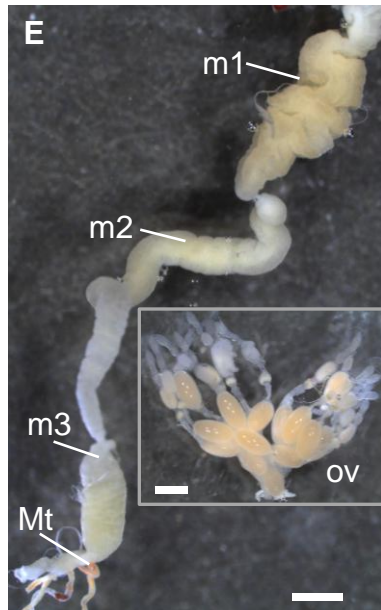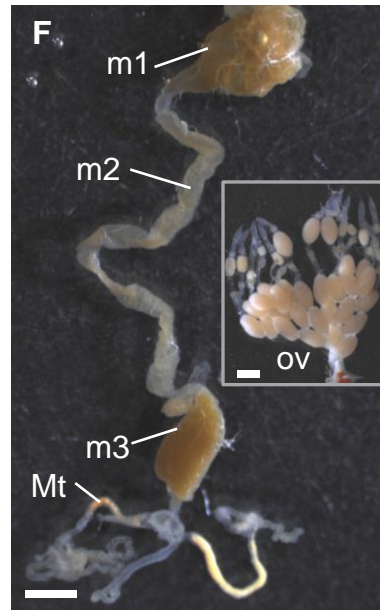

Supplement: ismej2011103x1.pdf [file ismej2011103x1.pdf]

0.05

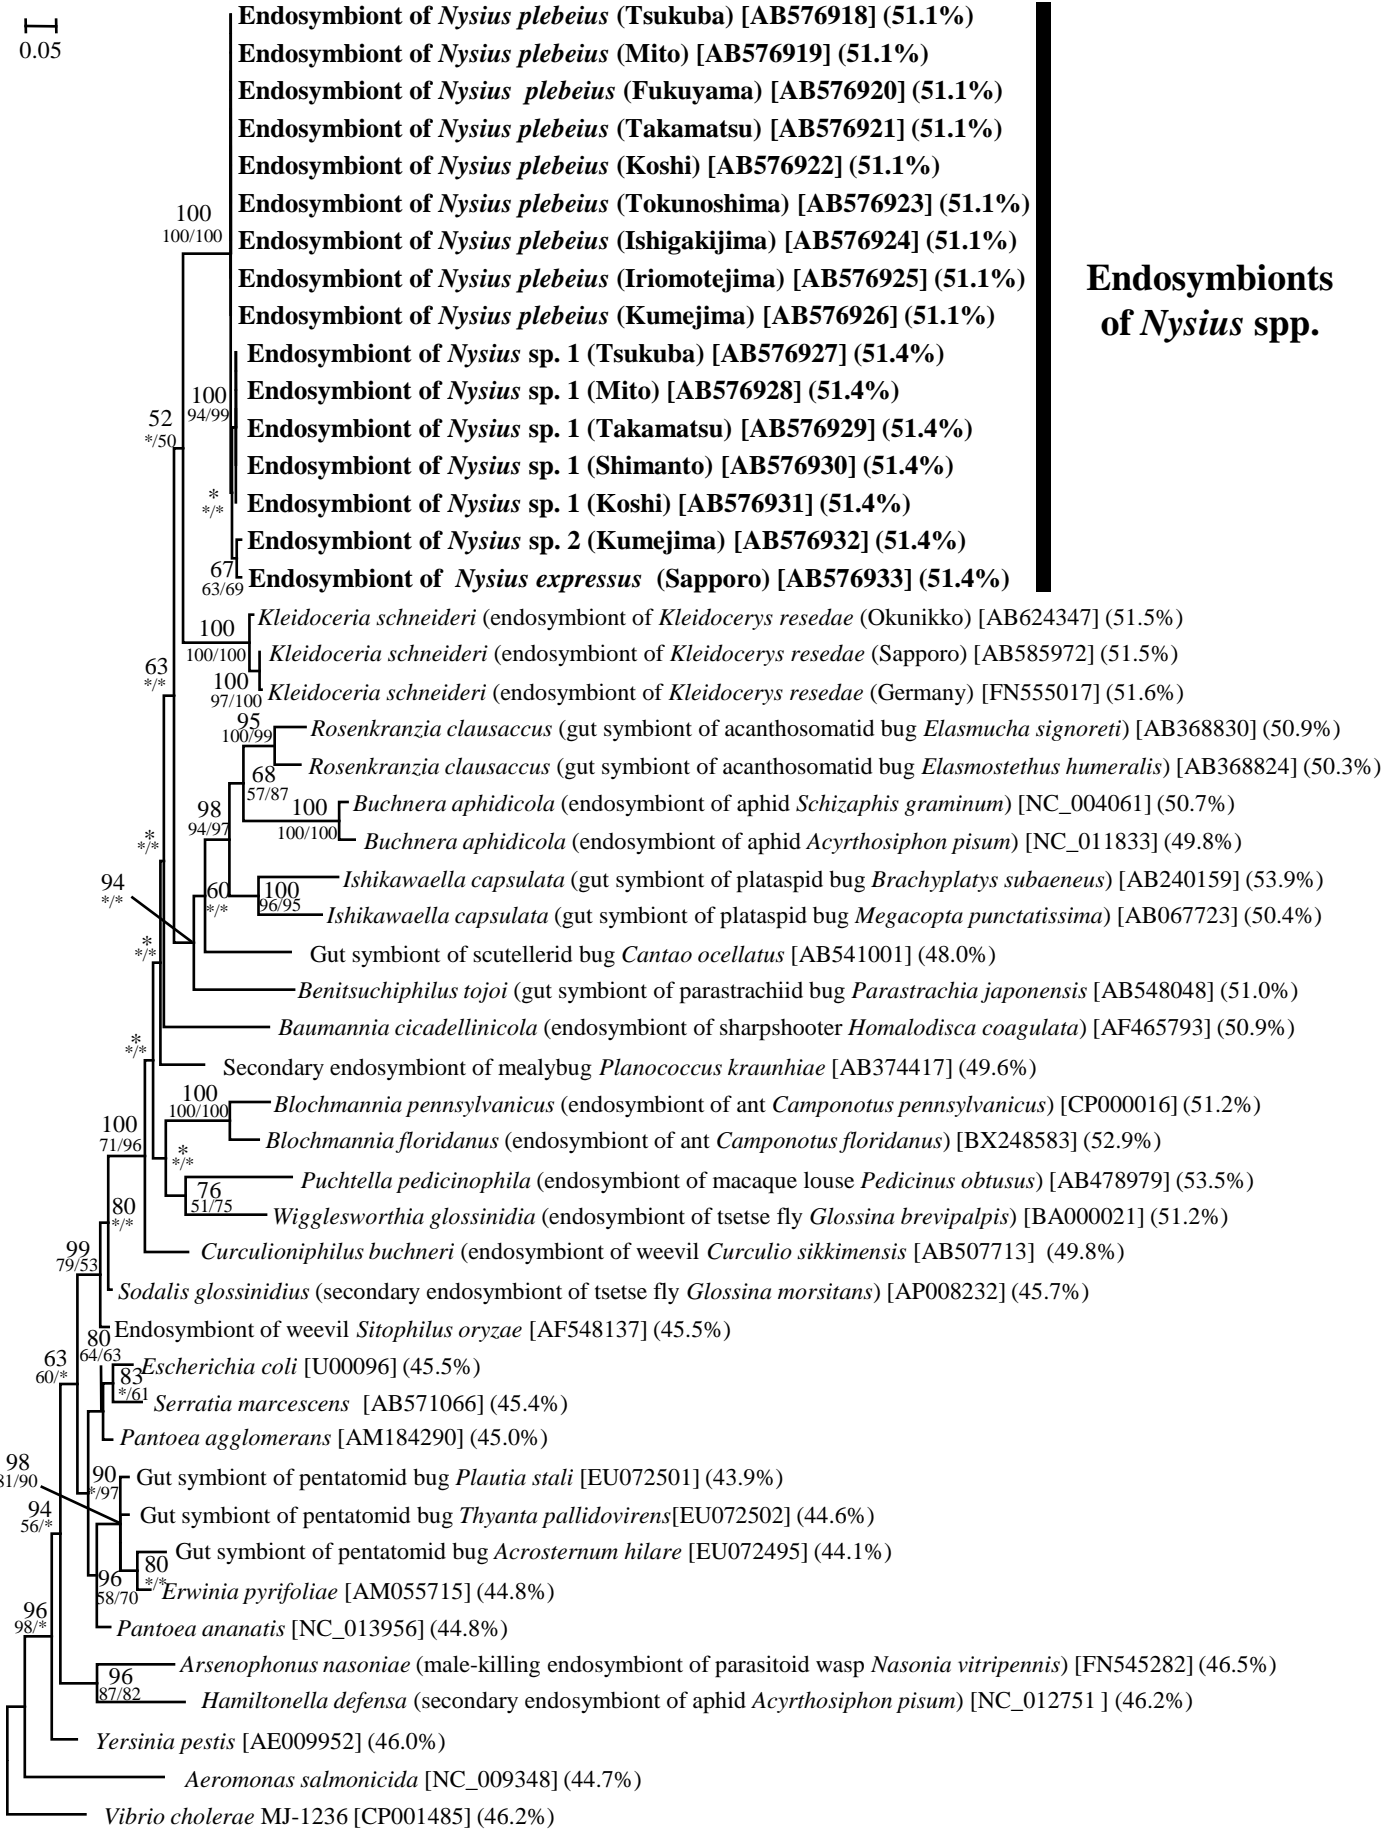

Supplement: ismej2011103x2.pdf [file ismej2011103x2.pdf]

0.05

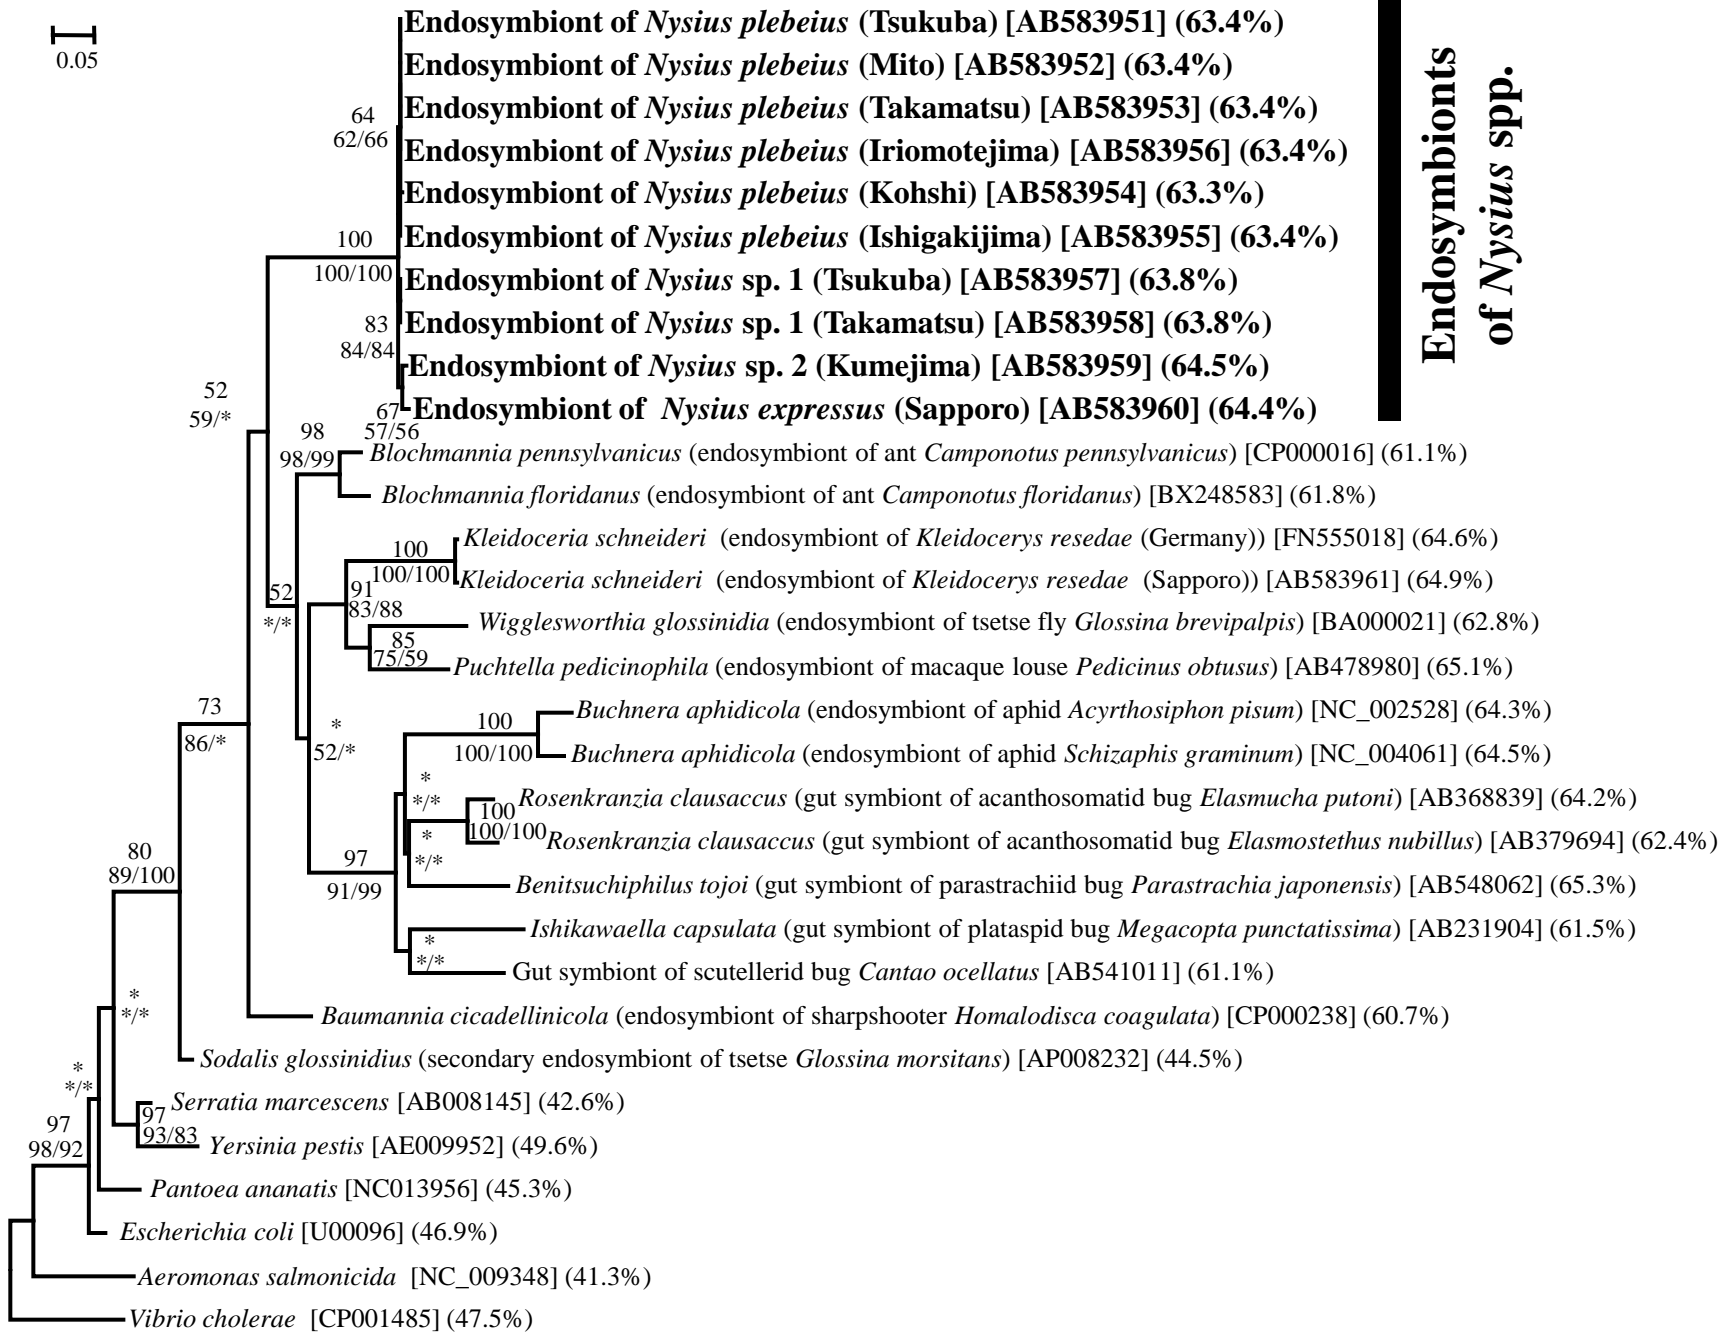

Supplement: ismej2011103x3.pdf [file ismej2011103x3.pdf]

0.05

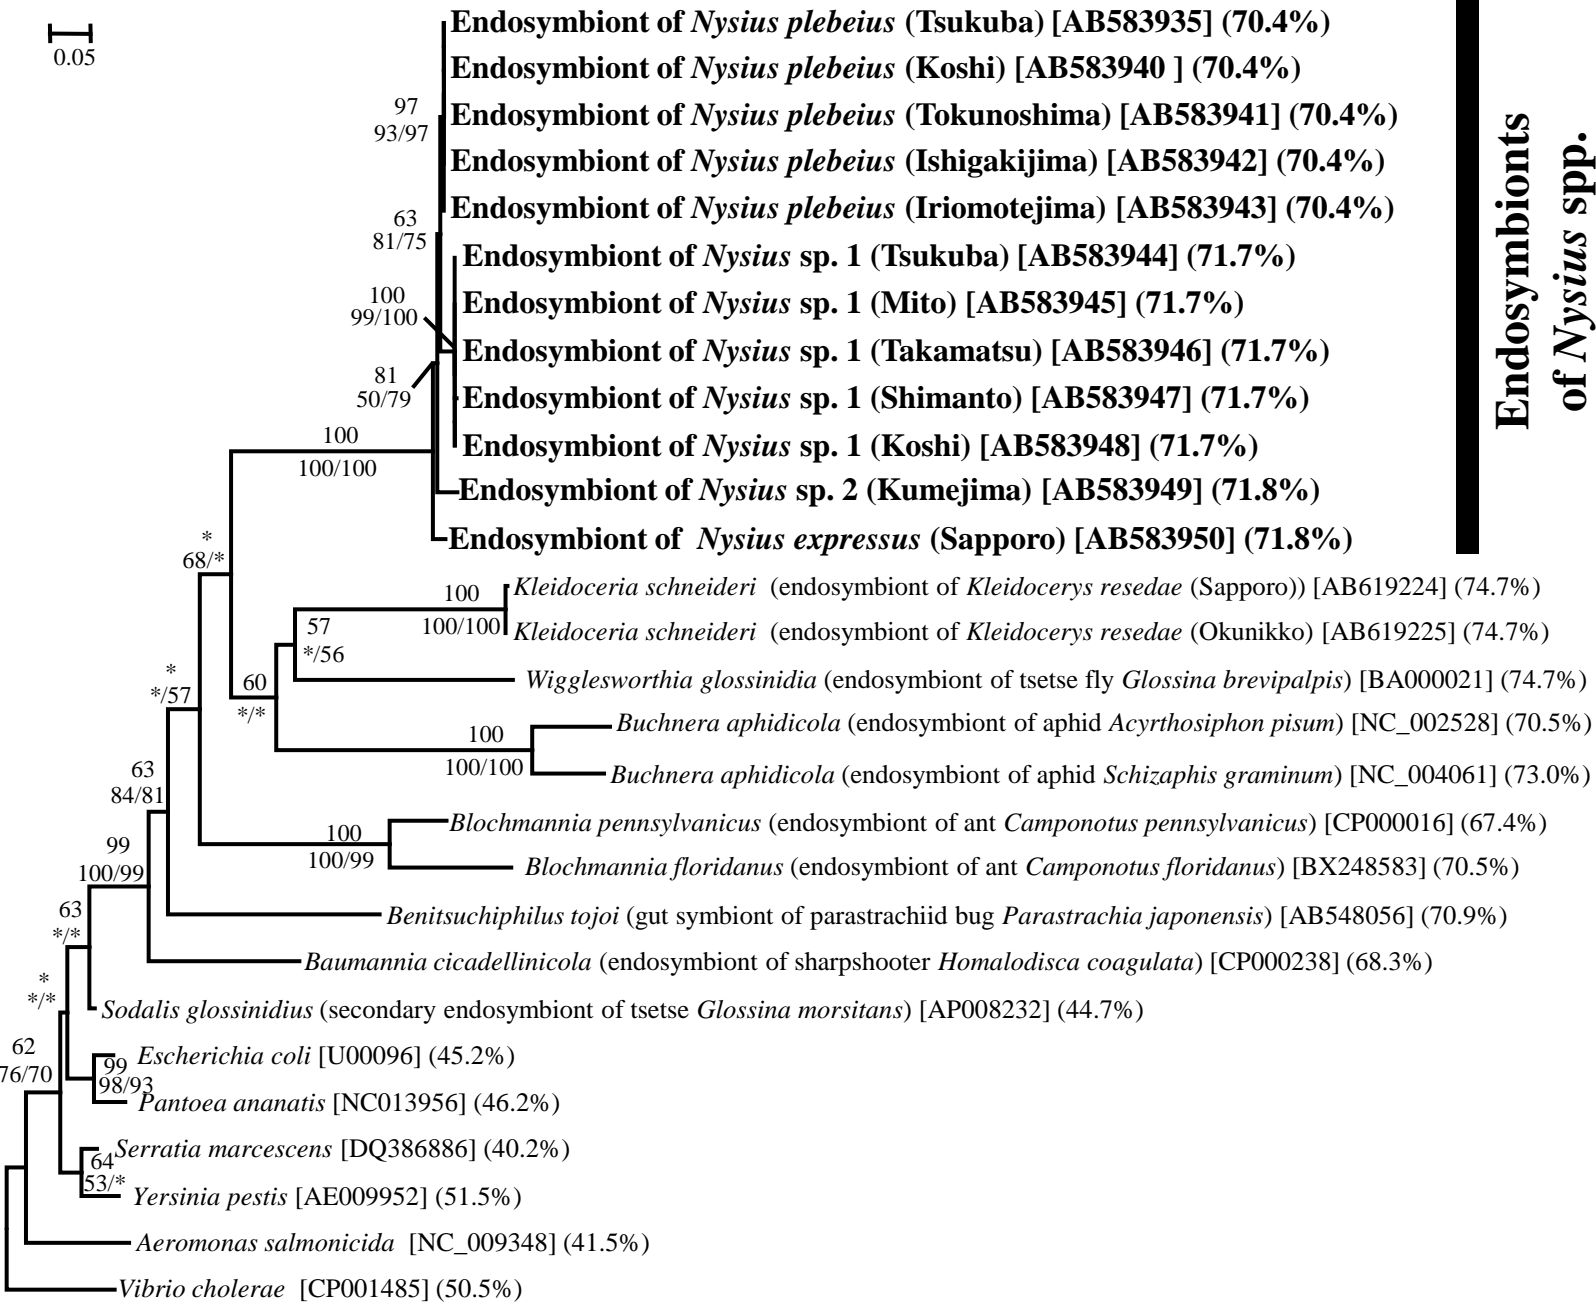

**Endosymbionts  
of *Nysius* spp.**

Supplement: ismej2011103x4.pdf [file ismej2011103x4.pdf]

0.1

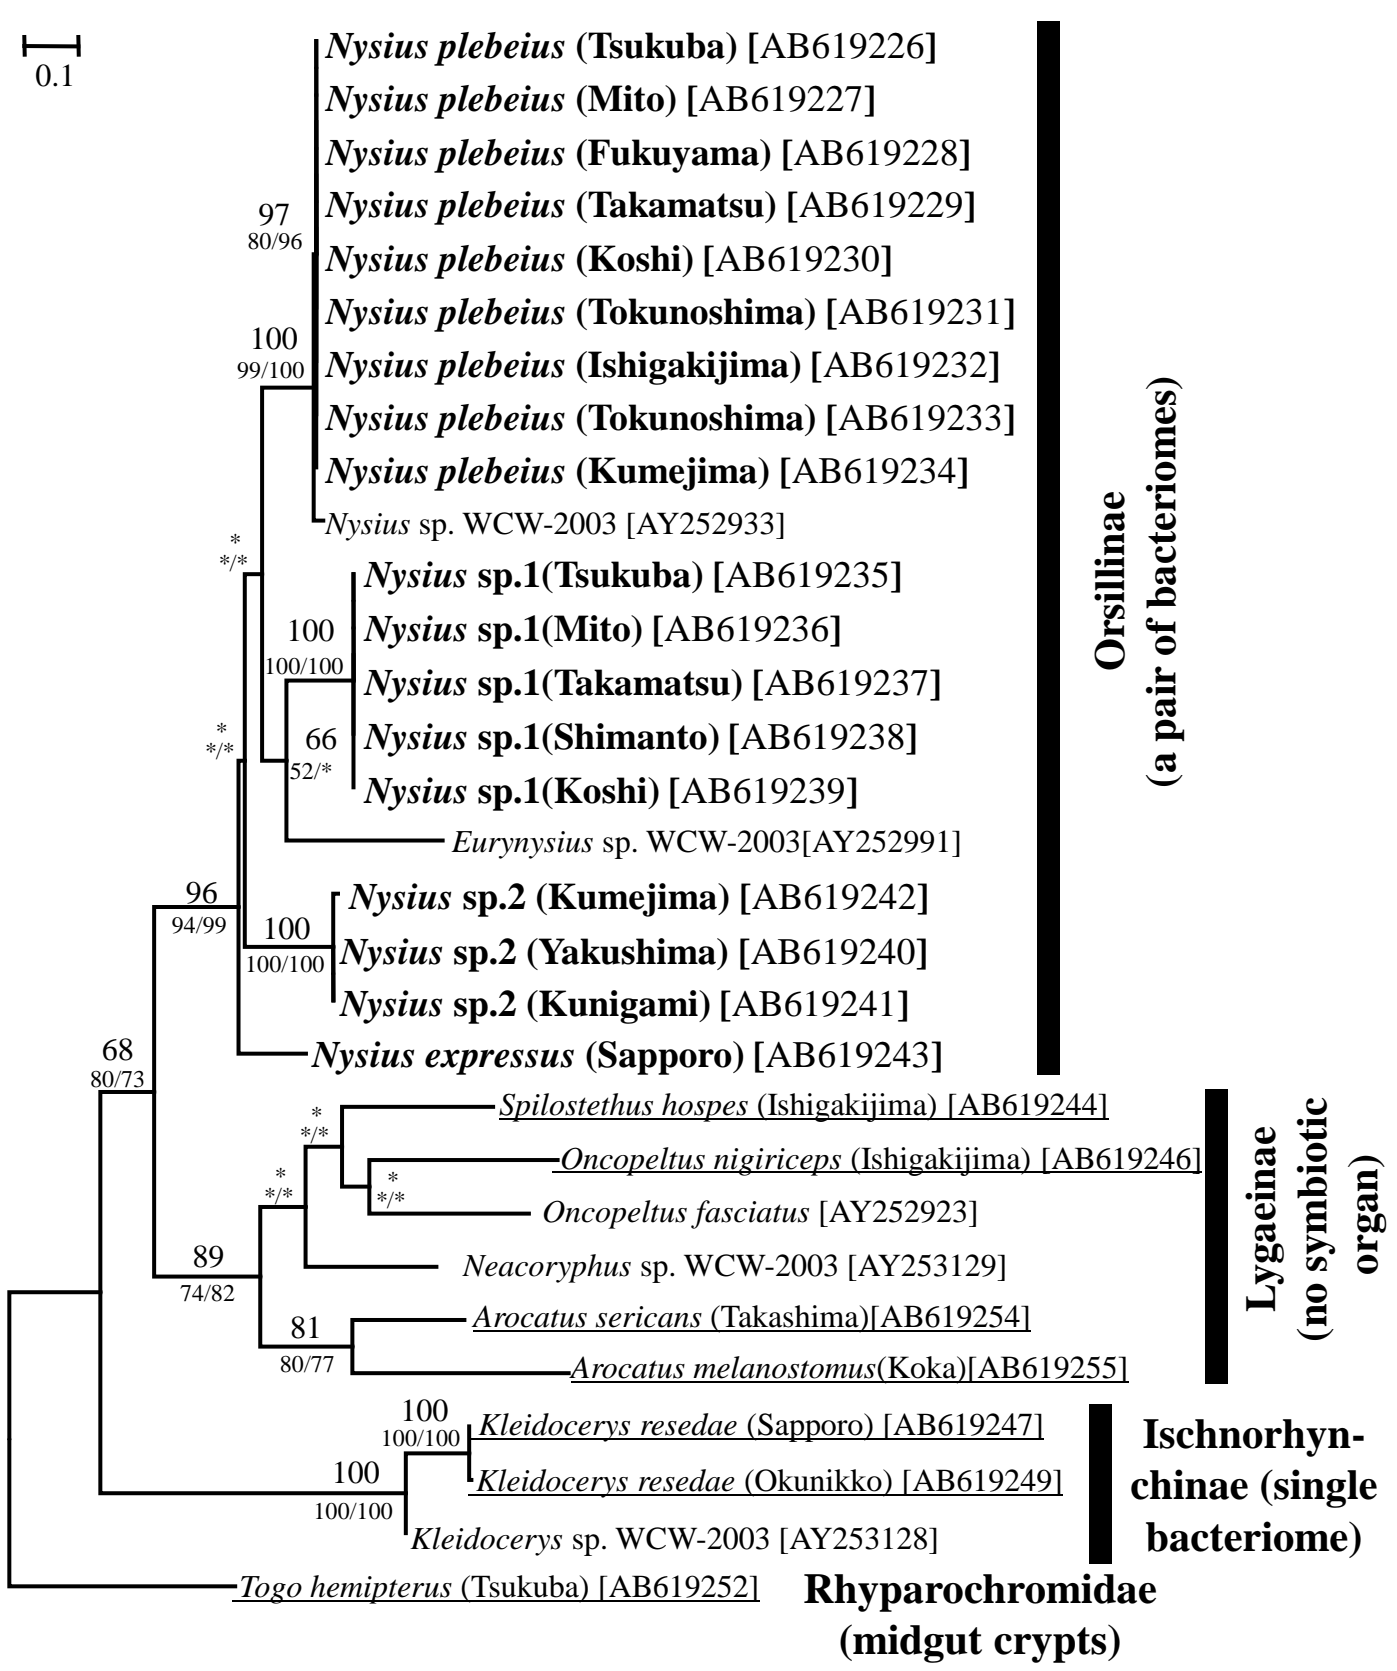

Supplement: ismej2011103x5.pdf [file ismej2011103x5.pdf]

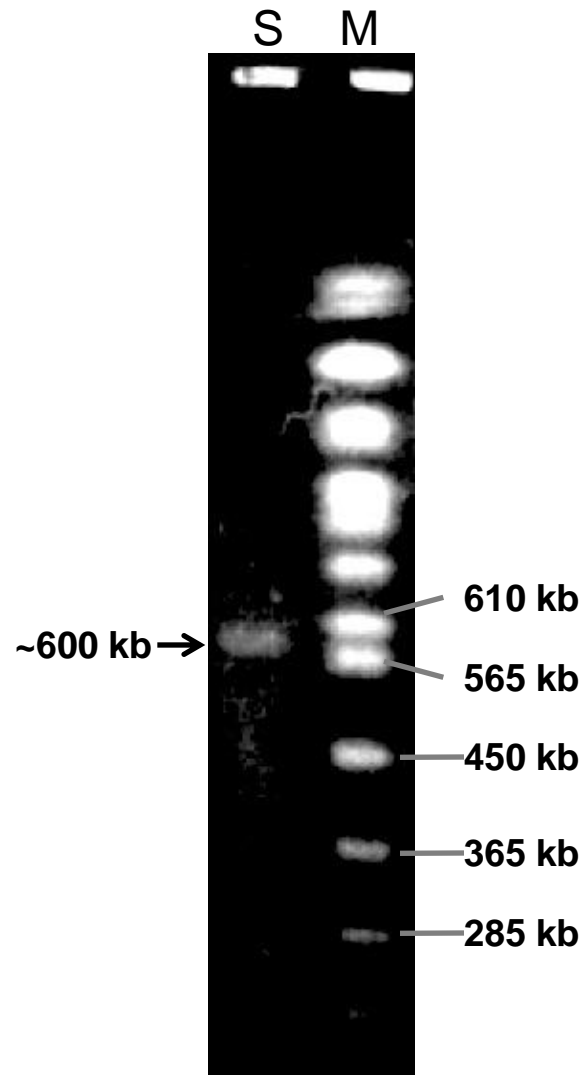

Supplement: ismej2011103x6.pdf [file ismej2011103x6.pdf]
